# Supplementary material
Source: Springer Nature journal article supplement (https://www.springermedizin.de/resource/supplementary/13063_2009_376_MOESM1_ESM.pdf/9618098)
Supplement: MOESM1 [file 9618098]

Enrolment  
Allocation  
Follow-up  
Analysis

Diabetes Clinics in Ireland = 46

Diabetes Clinics delivering DAFNE = 7

Participating Diabetes Clinics = 6

Patients assessed for eligibility from pre-existing waiting lists = xx  
Target sample size = 450

Randomisation of centres

DAFNE Week

Intervention Centres ( $n= 3$ )  
Receive structured curriculum/ patient-led group  
follow-up in their original groups

Usual Care Centres ( $n= 3$ )  
Return to usual one-to-one care following DAFNE  
course

Structured group follow-up and data collection at 6,  
12 and 18 months  
Number lost to follow-up will be recorded at each  
stage

One-to-one clinical visits and data collection at 6,  
12 and 18 months  
Number lost to follow-up will be recorded at each  
stage

Analysis ( $n = xx$ )  
Excluded from analysis ( $n = xx$ )

Analysis ( $n = xx$ )  
Excluded from analysis ( $n = xx$ )
